# Supplementary material for: Undesirable role of remnant PbI2 layer on low temperature processed planar perovskite solar cells
Source: Royal Society of Chemistry journal article supplement (doi:10.1039/c6ra19265c), 2016-01-01
Supplement: c6ra19265c1.pdf [file c6ra19265c1.pdf]

## Supporting information

### Undesirable Role of Remnant $\text{PbI}_2$ Layer On Low Temperature

#### Processed Planar Perovskite Solar Cells

Yangyang Du, Hongkun Cai,\* Hongbin Wen, Yuxiang Wu, Zhenglong, Li, Jian Xu, Like Huang, Jian Ni, Juan Li, Jianjun Zhang

*College of Electronic Information and Optical Engineering, Nankai University, Key Laboratory of Opto-electronic Information Science and Technology for Ministry of Education, Tianjin, 300071, China*

\* To whom correspondence should be addressed: [caihongkun@nankai.edu.cn](mailto:caihongkun@nankai.edu.cn).

Tel: +8602223508046

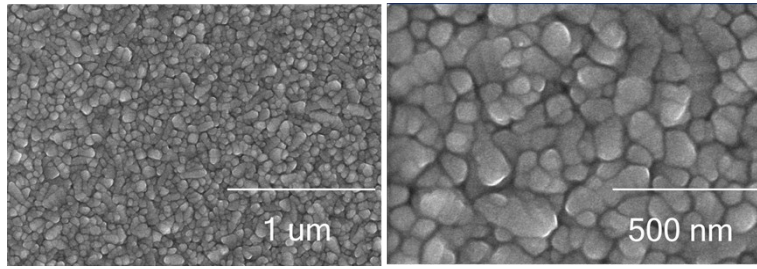

**Fig. S1** Scanning electron microscope (SEM) image of c-TiO<sub>2</sub> via anodic oxidation;

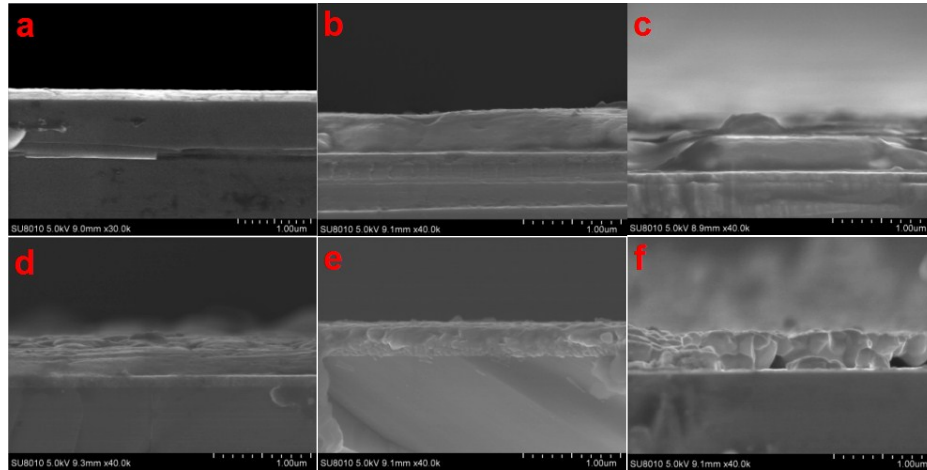

**Fig. S2** Cross section SEM images. (a) PbI<sub>2</sub> film fabricated by spinning PbI<sub>2</sub> DMF precursor solution (40 wt%); And CH<sub>3</sub>NH<sub>3</sub>PbI<sub>3</sub> films fabricated by CSD with various dipping time. (b) 1 min; (c) 3 min; (d) 5 min; (e) 7 min; (f) 9 min.

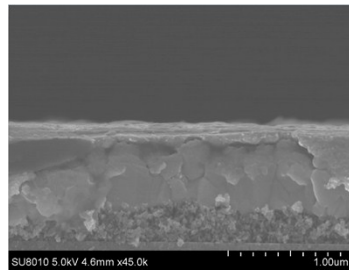

**Fig. S3** Cross section SEM image of CH<sub>3</sub>NH<sub>3</sub>PbI<sub>3</sub> fabricated by CSD method on mesoporous TiO<sub>2</sub> substrate with only 5 min dipping time.

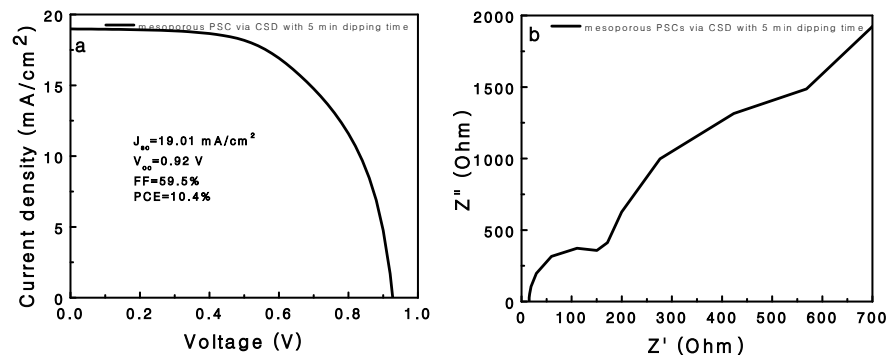

**Fig. S4** (a) J-V curve performance for mesoporous PSCs via CSD without encapsulation by 5 min dipping the CH<sub>3</sub>NH<sub>3</sub>I IPA solution; (b) corresponding Nyquist plots.

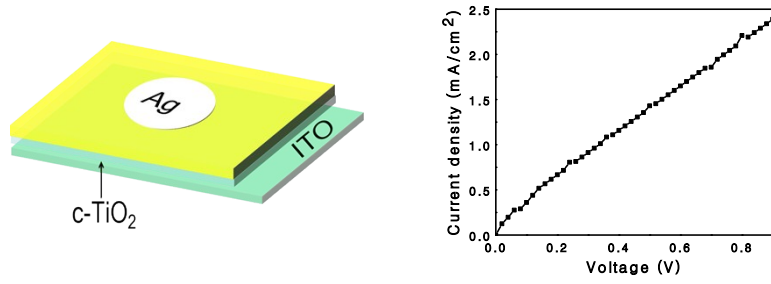

**Fig. S5** Device structure replacing  $\text{CH}_3\text{NH}_3\text{PbI}_3$  with  $\text{PbI}_2$  film and corresponding J-V curves performance .

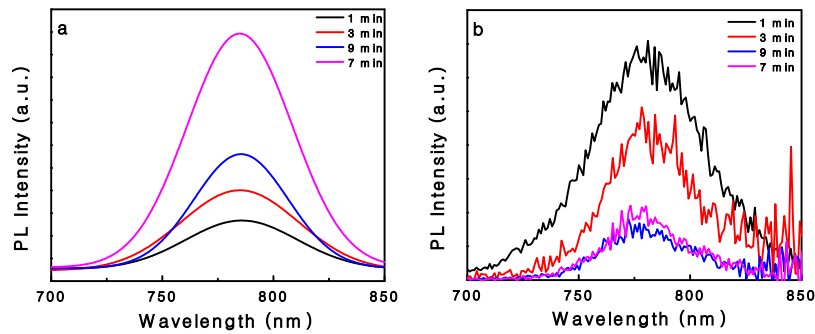

**Fig. S6** (a) steady-state photoluminescence (PL) for the pure  $\text{CH}_3\text{NH}_3\text{PbI}_3$  on glasses via CSD with different dipping time; (b) corresponding PL measurement when  $\text{CH}_3\text{NH}_3\text{PbI}_3$  contacted with  $\text{c-TiO}_2$ .

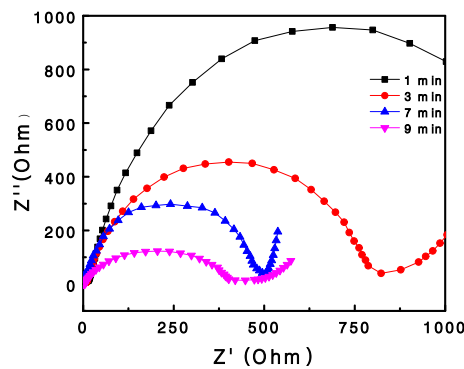

**Fig. S7** Nyquist plots at  $V=1.0$  v for planar PSCs based on CSD method with different dipping time.

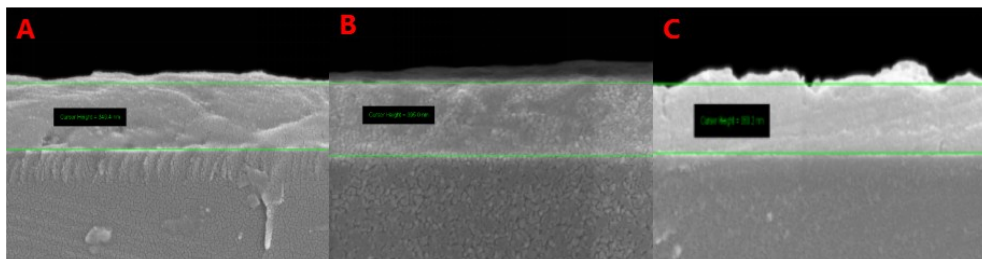

**Fig. S8** SEM cross section images for  $\text{CH}_3\text{NH}_3\text{PbI}_3$  films with different dipping time. (a) 3 min; (b) 5 min; (c) 7min.

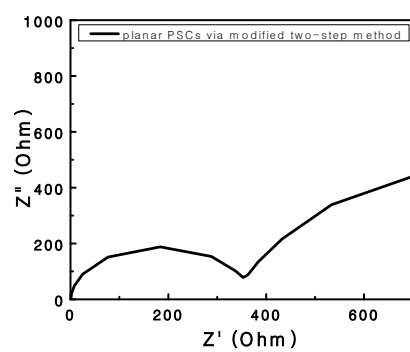

**Fig. S9** Nyquist plot at  $V=1.0$  v for planar PSCs based on modified two-step method.

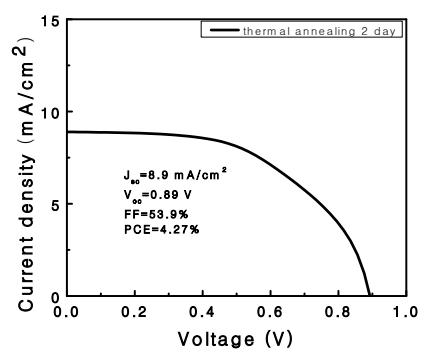

**Fig. S10** J-V curve performance for planar PSCs fabricated by modified two-step method with thermal annealing reaching 2 day.
